# Supplementary material for: Synthesis and performance evaluation of slow-release fertilizers produced from inverse vulcanized copolymers obtained from industrial waste
Source: Royal Society of Chemistry journal article supplement (doi:10.1039/d3ra00256j), 2023-01-01
Supplement: d3ra00256j1.pdf [file d3ra00256j1.pdf]

## Synthesis and performance evaluation of slow-release fertilizers produced from inverse vulcanized copolymers obtained from industrial waste

Ali Shaan Manzoor Ghumman <sup>a,b</sup>, Rashid Shamsuddin <sup>a,b,\*</sup>, Rabia Sabir <sup>c</sup>, Ammara Waheed <sup>c</sup>  
Abdul Sami<sup>b</sup> and Hamad Almohamadi<sup>d</sup>

<sup>a</sup> HICoE, Centre for Biofuel and Biochemical Research (CBBR), Institute of Self-Sustainable Building, Universiti Teknologi PETRONAS, 32610, Seri Iskandar, Perak, Malaysia.

<sup>b</sup> Chemical Engineering Department, Universiti Teknologi PETRONAS, 32610 Bandar Seri Iskandar, Perak Darul Ridzuan, Malaysia.

<sup>c</sup> Department of Chemical Engineering, Wah Engineering College, University of Wah, Wah Cantt, 47040, Punjab, Pakistan

<sup>d</sup> Department of Chemical Engineering, Faculty of Engineering, Islamic University of Madinah, Madinah Saudi Arabia.

\*Corresponding Author: [mrashids@utp.edu.my](mailto:mrashids@utp.edu.my)

### Supplementary Information:

Table S1: Primary Data for Nitrogen Release Test in Distilled Water.

| Time (days) | Cumulative Nitrogen Release (%) |          |         |           |         |            |         |          |         |
|-------------|---------------------------------|----------|---------|-----------|---------|------------|---------|----------|---------|
|             | Pristine Urea                   | 50-S-M-I | Std Dev | 50-S-M-II | Std Dev | 50-S-M-III | Std Dev | 60-S-M-I | Std Dev |
| 0           | 0                               | 0        | 2.29595 | 0         | 0       | 0          | 0       | 0        | 0       |
| 1           | 99.8                            | 14       | 2.46855 | 10        | 0.25066 | 9.5        | 1.23092 | 20       | 0.23105 |
| 2           | 100                             | 22       | 2.57487 | 12.52     | 1.32725 | 15.028     | 4.11771 | 25       | 1.27165 |
| 3           | 100                             | 25       | 2.65405 | 14.89     | 1.865   | 16.258     | 5.0644  | 26       | 0.18188 |
| 4           | 100                             | 31.02    | 2.64198 | 16.03     | 2.52591 | 18.0258    | 2.93    | 28       | 0.63625 |
| 5           | 100                             | 33       | 2.67197 | 22.089    | 1.32428 | 18.59      | 3.315   | 35       | 0.56731 |
| 6           | -                               | 35.84    | 2.50191 | 25.148    | 2.06019 | 19.0258    | 2.33    | 36       | 0.58652 |
| 7           | -                               | 40.025   | 2.34733 | 25.56     | 2.61118 | 20.023     | 2.17    | 38       | 0.59094 |
| 8           | -                               | 43       | 1.90608 | 25.89     | 2.86119 | 28.9       | 1.9     | 47       | 0.59094 |
| 9           | -                               | 45       | 1.55781 | 26.29     | 2.08506 | 30         | 1.095   | 53       | 0.22235 |
| 10          | -                               | 55.048   | 1.23396 | 35.68     | 2.08506 | 30.056     | 0.58    | 64       | 0.22372 |
| 11          | -                               | 60       | 1.10129 | 38.025    | 1.86304 | 30.58      | 1.5     | 71.25    | 0.22479 |
| 12          | -                               | 62.085   | 0.8998  | 40.24     | 2.0857  | 30.856     | 1.15    | 75.18    | 0.22587 |
| 13          | -                               | 68.254   | 0.97294 | 41.85     | 2.21951 | 35.26      | 1.68    | 83.28    | 0.19211 |
| 14          | -                               | 74.2365  | 0.97874 | 44.158    | 2.29595 | 40.015     | 1.96    | 93.05    | 0.0013  |
| 15          | -                               | 78.956   | 0.86264 | 45.02     | 2.46855 | 42.015     | 2.085   | 98.85    | 0.0013  |
| 16          | -                               | 83.54    | 0.7539  | 50.0369   | 2.57487 | 43.28      | 1.98    | 99.5     | 0.0013  |
| 17          | -                               | 88.45    | 0.30188 | 55.214    | 2.65405 | 44.15      | 2.34    | 100      | 0.0013  |
| 18          | -                               | 94.35    | 0.3331  | 58.9      | 2.64198 | 48.59      | 2.505   | -        | -       |
| 19          | -                               | 98.45    | 0.36579 | 62.15     | 2.67197 | 56.45      | 0.98    | -        | -       |

|    |   |       |         |        |         |        |       |   |   |
|----|---|-------|---------|--------|---------|--------|-------|---|---|
| 20 | - | 98.79 | 0.18778 | 63.145 | 2.50191 | 67.15  | 1.345 | - | - |
| 21 | - | 99.45 | 0.24698 | 63.89  | 2.34733 | 75.26  | 1.045 | - | - |
| 22 | - | 100   | 0.29671 | 65.248 | 1.90608 | 75.45  | 0.105 | - | - |
| 23 | - | -     | -       | 66     | 1.55781 | 75.78  | 1.08  | - | - |
| 24 | - | -     | -       | 68.248 | 1.23396 | 76.25  | 1     | - | - |
| 25 | - | -     | -       | 75.25  | 1.10129 | 78.154 | 0.45  | - | - |
| 26 | - | -     | -       | 78.25  | 0.8998  | 78.45  | 0.91  | - | - |
| 27 | - | -     | -       | 79.24  | 0.97294 | 78.894 | 0.985 | - | - |
| 28 | - | -     | -       | 80.24  | 0.97874 | 79.35  | 0.87  | - | - |
| 29 | - | -     | -       | 83.25  | 0.86264 | 85.02  | 0.39  | - | - |
| 30 | - | -     | -       | 85     | 0.7539  | 90.23  | 0.285 | - | - |

Table S2: Primary data for biodegradability test

| Time | Weight Loss (%) |
|------|-----------------|
| 5    | 0.5             |
| 10   | 2               |
| 15   | 3.5             |
| 20   | 5.25            |
| 25   | 7.25            |
| 30   | 9.48            |
| 35   | 12.02           |
| 40   | 14.48           |
| 45   | 15.47           |
| 50   | 18.25           |
